# Supplementary material for: Phosphorus stress strongly reduced plant physiological activity, but only temporarily, in a mesocosm experiment with Zea mays colonized by arbuscular mycorrhizal fungi
Source: Copernicus journal article supplement (doi:10.5194/bg-2021-168), 2021-07-12
Supplement: Supplementary file [file bg-2021-168-RC1-supplement.pdf]

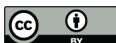

# Phosphorus stress strongly reduced plant physiological activity, but only temporarily, in a mesocosm experiment with *Zea mays* colonized by arbuscular mycorrhizal fungi

Melanie S. Verlinden<sup>1</sup>, Hamada AbdElgawad<sup>2,3</sup>, Arne Ven<sup>1</sup>, Lore T. Verryckt<sup>1</sup>, Sebastian  
5 Wieneke<sup>1,4</sup>, Ivan A. Janssens<sup>1</sup>, Sara Vicca<sup>1</sup>

<sup>1</sup>Plant and Vegetation Ecology (PLECO), Department of Biology, University of Antwerp, Wilrijk, 2610, Belgium

<sup>2</sup>Botany and Microbiology Department, Faculty of Science, Beni-Suef University, Beni-Suef, 62521, Egypt

<sup>3</sup>Integrated Molecular Plant Physiology Research (IMPRES), Department of Biology, University of Antwerp,  
10 Antwerp, 2020, Belgium

<sup>4</sup>Remote Sensing Centre for Earth System Research (RSC4Earth, Faculty of Physics and Earth Sciences, University of Leipzig, Leipzig, 04109, Germany

Correspondence to: Melanie S. Verlinden ([Melanie.Verlinden@uantwerpen.be](mailto:Melanie.Verlinden@uantwerpen.be)); Sara Vicca ([Sara.Vicca@uantwerpen.be](mailto:Sara.Vicca@uantwerpen.be))

15 **Abstract.** **Despite** being an essential macronutrient for plant growth, phosphorus (P) is one of the least available nutrients in soils and P limitation is often a major constraint for plant growth globally. Although P addition experiments have been carried out to study the long-term effects on the yield, data on P addition effects to seasonal variation in leaf-level photosynthesis are scarce. Arbuscular mycorrhizal fungi (AMF) can be of major importance for plant nutrient uptake, and AMF growth may be important for explaining temporal patterns in leaf  
20 physiology. **In a nitrogen (N) and P fertilization experiment with *Zea mays*, we investigated the effect of P limitation on leaf pigments and leaf enzymes, how these relate to leaf-level photosynthesis, and how these relationships change during the growing season.** Previous research indicated that N addition did not affect plant growth and also the leaf measurements in the current study were unaffected by N addition. Contrary to N addition, P addition strongly influenced plant growth and leaf-level measurements. At low soil P availability,  
25 leaf-level photosynthetic and respiratory activity were strongly decreased and this was associated with reduced chlorophyll and photosynthetic enzymes. Contrary to the expected increase in P stress over time following gradual soil P depletion, plant P-limitation decreased over time. For most leaf-level processes, pigments and enzymes under study, the fertilization effect had even disappeared two months after planting. Our results point towards a key role for the AMF-symbiosis and consequent increase of P uptake in explaining the vanishing P  
30 stress.

## 1 Introduction

Phosphorus (P) is an essential macronutrient for plant growth, playing a role in most developmental and biochemical processes in plants. Structurally, P ~~participates in the formation~~ of RNA and membrane  
35 phospholipids, while metabolically, P functions in the storage and transfer of energy and **in energizing of binding sites for metabolic turnover** (Schulze et al., 2005). However, P is one of the least available macronutrients in

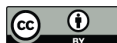

soils, and P limitation is often a major constraint for plant growth (Augusto et al., 2017). More than one third of the arable land worldwide is considered to experience P stress (Calderón-Vázquez et al., 2009).

Various experiments have been conducted to study the effect of P addition to crops, thereby mainly focusing on the long-term effect on the yield (Khan et al., 2018; Johnston and Poulton, 2019). However, data on seasonal variation in leaf-level photosynthesis, especially in crops, are scarce (Rogers, 2014), while accurate seasonal estimates of photosynthetic capacity are critical for modelling the time course of carbon fluxes (Miner and Bauerle, 2019). The majority of studies investigating effects of nutrients on photosynthesis focus on nitrogen (N) and much less on P and other nutrients. In addition it is unclear whether leaf traits, such as leaf nutrients, pigments and enzymes, change seasonally in relation to leaf-level photosynthesis.

Among others, plant P limitation typically results in reduced photosynthesis and plant growth, especially aboveground. P is required for adenosine triphosphate (ATP) synthesis, which is needed to regenerate Ribulose 1,5-bisphosphate (RuBP) in the Calvin cycle of photosynthesis. P-deficiency therefore leads to a decrease in RuBP pool size and insufficient ATP, and consequently to a decrease in photosynthetic C assimilation. The content and specific activity of rubisco, the primary CO<sub>2</sub> fixing enzyme in photosynthesis, are generally little affected by P-stress (Brooks, 1986; Paul and Stitt, 1993; Pieters et al., 2001, but see Jacob and Lawlor, 1991; Pieters et al., 2001). Leaf starch, playing an important role in the cellular recycling of phosphate for photosynthesis, often increases with P-stress (Zhang et al., 2014) due to low availability of P for triphosphate translocation, however decreases of leaf starch have also been observed (Halsted and Lynch, 1996).

In a mesocosm nutrient manipulation experiment setup (previously described in Verlinden et al., 2018), maize (*Zea mays* L.) was planted at different soil N and P availabilities. As demonstrated in Verlinden et al. (2018), this resulted in a strong P, but no N effect on plant growth or photosynthesis at mesocosm scale. In that study, also arbuscular mycorrhizal fungi (AMF) played an important role in explaining plant carbon uptake and allocation. AMF are important for nutrient uptake in maize (Hartnett and Wilson, 1999; Hoeksema et al., 2010), especially for P, and hence AMF growth may also be important for explaining variation in leaf physiology. The objective of the current study is to verify the effect of P limitation on leaf pigments and leaf enzymes, how they relate to leaf-level photosynthesis, and how these relationships change during the growing season. At low soil P availability, we expected low leaf-level photosynthetic and respiratory activity, associated with reduced chlorophyll and photosynthetic enzymes. Furthermore, P-stress was expected to increase over time, as plants were expected to gradually deplete the soil P.

## 2 Material and methods

### 2.1 Experimental design

A mesocosm experiment consisting of 20 (1 m × 1.2 m, 0.6 m high) insulated boxes was set up in a greenhouse in Sint-Katelijne-Waver, Belgium (51°04'38" N, 4°32'05" E). To each mesocosm we added soil, which was a homogenized mixture of sand originating from a pine forest in a nature reserve in Flanders, white river sand and a minority of compost (details of the experimental setup are described in Verlinden et al. (2018)). On 20 May 2016, 12 seedlings of maize (*Zea mays* L., variety 'Tom Thumb') were planted per mesocosm. Different treatments (set up in five replicates) were distinguished in the level of nutrients added: the +N treatment was fertilized with calcium nitrate at a rate of 95.5 kg N ha<sup>-1</sup> (YaraLiva® Calcinit®), the +P treatment received 20 kg



P ha<sup>-1</sup> as triple superphosphate (Janssens-Smeets®), the combined +N and +P treatment (+NP) received both amounts together. The control treatment received, as all other treatments, only a basic level of micronutrients (Fertigreen® Patentkali® and GroGreen® containing in kg ha<sup>-1</sup>: 79 Potassium, 19 Magnesium, 53 Sulfur, 0.4 Boron, 0.1 Copper, 2.4 Iron, 1.1 Manganese, 0.1 Molybdenum, 0.4 Zinc). Spores-based inoculum of AMF 80 (species *Rhizophagus irregularis*, Symplanta®) was added to all 20 (4 treatments × 5 replicates) mesocosms. Soil moisture was monitored and kept at a non-limiting (field capacity) level, similar in all plots.

## 2.2 Measurements and analyses

### 2.2.1 Leaf C, N and P concentration and Specific Leaf Area

Carbon (C) and N concentrations were determined using an elemental analyzer - model FLASH 2000 (Thermo 85 Fisher Scientific, Waltham, USA). Total leaf P concentration was determined by digestion in tubes with H<sub>2</sub>SO<sub>4</sub>-salicylic acid- H<sub>2</sub>O<sub>2</sub> and selenium (Temminghoff and Houba, 2004). Specific Leaf Area (SLA; m<sup>2</sup> kg<sup>-1</sup>) was determined as the ratio of the fresh leaf area and dry leaf mass.

### 2.2.2 Leaf Photosynthesis

A portable gas exchange system LI-6400 (LI-COR, Lincoln, NE, USA) was used for leaf scale CO<sub>2</sub> gas 90 exchange measurements, operating as an open system (e.g. Verlinden et al., 2013). Leaf-scale measurements were performed during two weeks late June (campaign 1, C1) and repeated end of July (campaign 2, C2), allowing to study the seasonal **evolution**. Mean daily photosynthetically active radiation (PAR) during C1 and C2 were respectively 17.1 and 17.7 mol·m<sup>-2</sup> and average temperature respectively 21.7 and 23.3 °C.

In each plot photosynthetic CO<sub>2</sub>-response curves (i.e. photosynthesis (A, assimilation) responses to the CO<sub>2</sub> 95 concentration inside leaf air spaces (c<sub>i</sub>)) were measured on a recently matured leaf. Leaves were allowed to equilibrate at a CO<sub>2</sub> concentration of 400 μmol mol<sup>-1</sup> in the leaf cuvette, after which the **net assimilation rate** at a sequence of different CO<sub>2</sub> concentrations (i.e. 400, 30, 50, 80, 110, 150, 250, 350, 500 and 1000 μmol mol<sup>-1</sup>) was measured. Photosynthetic photon flux density (PPFD) was fixed at a saturating value of 1200 μmol s<sup>-1</sup> m<sup>-2</sup>. The resulting A-c<sub>i</sub> data were fitted to the biochemical model of C<sub>4</sub> photosynthesis as presented by von Caemmerer 100 (2000) using the package 'Plantecophys' (Duursma, 2015) in R version 3.3.1 (R Foundation for Statistical Computing, Vienna, Austria). The **assimilation rate** is approximated by the minimum of the expressions of an enzyme-limited and an electron-transport-limited CO<sub>2</sub> assimilation rate. The parameters J<sub>max</sub> (maximum electron transport rate), v<sub>cmax</sub> (maximal rubisco carboxylation rate) and v<sub>pmax</sub> (maximum PEP carboxylation rate) were calculated through curve fitting based on minimum least-squares.

105 Photosynthetic light-response curves were obtained by measurements of the **net assimilation rate** at PPFD's of 1200, 500, 250, 100, 80, 60, 40, 30, 25, 20, 15, 10, 5 and 0 μmol m<sup>-2</sup> s<sup>-1</sup> (blue-red LED source type 6400-02B, 13% blue light). Leaves were allowed to equilibrate at each step before logging the data. The CO<sub>2</sub> concentration in the cuvette was maintained at 400 μmol mol<sup>-1</sup> and the block temperature at 25°C. From the **light response** curves, the **net assimilation rate** at light saturation (A<sub>max</sub>) and leaf dark respiration (R<sub>dark</sub>, net CO<sub>2</sub> exchange at 110 zero light) were derived. In addition, light-induced inhibition of leaf respiration was estimated from the **light response curves** (for PPFD's 0 to 80 μmol m<sup>-2</sup> s<sup>-1</sup>) from the intersections of the fitted lines above and below the light compensation point the y-axis, giving respectively R<sub>light</sub> and R<sub>dark</sub> (Kok, 1948). All selected leaves were harvested and stored at -80°C for later analyses.



### 2.2.3 Chemical analyses of leaf material

115 Rubisco activity was analyzed according Sulpice et al. (2007). It was expressed as the conversion rate of  
phosphor-glycerate kinase (3-PGA) of extracted leaf samples, in  $\mu\text{mol 3-PGA m}^{-2} \text{ min}^{-1}$ . The assay of  
phosphoenolpyruvate carboxylase (PEPC) was coupled with the malate dehydrogenase reaction, the resulting  
measure of PEPC activity was expressed in  $\mu\text{mol HCO}_3 \text{ m}^{-2} \text{ min}^{-1}$ .

Mono- and oligosaccharides in leaf-tissue were analyzed chromatographically according to AbdElgawad et al.  
120 (2014). Soluble sugar concentrations were measured by high performance anion exchange chromatography of  
extracted leaf samples with pulsed amperometric detection (HPAEC-PAD) and the total soluble sugars was  
calculated as their sum. The remaining pellet of soluble sugars extraction was treated with a mixture of  $\alpha$ -  
amylase and amyloglucosidase to extract starch.

High-performance liquid chromatography (HPLC) was used to analyze leaf pigments. The detection of the  
125 carotenoids and xanthophylls was done by a diode array detector (Shimadzu SPD-M10Avp) at four different  
wavelengths (420, 440, 462, 660 nm) and integrated via the software program (Shimadzu Lab Solutions Lite) in  
which the concentration was determined using a calibration curve.

### 2.2.4 Mycorrhizal fungi

Because AMF growth is potentially crucial for explaining patterns in the leaf response to P limitation, we  
130 determined the time course of AMF abundance in each of the mesocosms. To this end, five mesh bags filled with  
white river sand – and permeable for fungi but not for roots (30  $\mu\text{m}$  mesh size) – were buried vertically into the  
top soil of each mesocosm one week before planting. They were harvested consecutively 31 (corresponding to  
C1, v.i.) and 61 days (right before C2) after planting. Hyphae were extracted from 4 g mesh bag sand using the  
method of Rillig et al. (1999). After suspending, processing and colouring the sample, hyphal intersects were  
135 counted at a magnification of  $40 \times 10$  using a grid in the microscope ocular. Hyphal length density was  
calculated following Eq. (1) (Tennant, 1975; Rillig et al., 1999):

$$\text{HLD} = (\pi \cdot n \cdot a \cdot d) \cdot (h \cdot w)^{-1}, \quad (1)$$

where HLD = hyphal length density (mm hyphae  $\text{g}^{-1}$  soil), n = number of intersects containing AMF hyphae, a =  
filter area ( $\text{mm}^2$ ) examined, d = dilution factor, h = total length of raster lines projected on filter (mm), and w =  
140 soil weight (g).

### 2.2.5 Statistical Analyses

Data normality and homoscedasticity were checked using the Shapiro-Wilk and Levene's test, respectively. A  
three-way mixed analyses of variance (ANOVA) was applied to test if the quantified variables differed between  
the treatments and between C1 and C2. N addition and P addition were both considered as between-subject  
145 variables and time (campaign) as a within-subject variable. Non-significant interactions terms, and further, non-  
significant factors were removed from the model. In case of significant interaction between factors, the analysis  
included their multiplied factor levels. A Tukey post-hoc test was applied for pairwise comparison in case of  
significant factor effects.

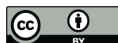

### 3 Results

150 The addition of P-fertilizer increased soil P availability (Verlinden et al., 2018), as well as leaf P concentration (Table 1). At the time of C1, leaf P concentration was three to four times higher in the +P and +NP treatments than in the non-P-fertilized control and +N treatments. Leaf N:P ratio was higher in the non-P-fertilized treatments than in the P-fertilized treatments (an average N:P ratio of 19.8 versus 37.2 for the non-P-fertilized treatments). However, in C2, the leaf P concentration had increased in all treatments to a similar level (Table 1), as well as the N:P ratio, which decreased for all treatments to a similar level with a mean of 13.8. Leaves in the non-P-fertilized mesocosms were thinner ~~as compared to~~ the P-fertilized mesocosms (Table 1) during C1, with mean SLA values of respectively  $52.9 \pm 0.9$  and  $33.9 \pm 1.9$  m<sup>2</sup> kg<sup>-1</sup>. Towards later in the season, SLA decreased in all mesocosms and the difference between non-P-fertilized and P-fertilized mesocosms had disappeared at the time of C2.

160 The majority of leaf physiology parameters differed considerably between C1 versus C2 for the non-P-fertilized treatments, while for the P-fertilized treatments differences between C1 and C2 were much less pronounced. During C1, photosynthetic activity was very low in the non-P-fertilized treatments, with a mean A<sub>max</sub> of 6.2 (± 4.1) μmol m<sup>-2</sup> s<sup>-1</sup> for the control and +N treatments. In contrast, the +P and +NP treatments showed a mean A<sub>max</sub> more than four times higher than in the non-P-fertilized mesocosms (Fig. 1A). A similarly high A<sub>max</sub>-level was reached for all treatments in C2 (Fig. 1A). Also R<sub>dark</sub> was smaller in the non-P-fertilized treatments in C1 (Fig. 1B) and reached a similar level as the +P and +NP treatments in C2. Photosynthetic parameters J<sub>max</sub>, v<sub>cmax</sub> and v<sub>pmax</sub> were all lower in the non-P-fertilized treatments than in the P-fertilized treatments during C1 (Figs. 1C-E), but by the time of C2, J<sub>max</sub> had increased in the non-P-fertilized mesocosms to the level of the P-fertilized mesocosms. v<sub>cmax</sub> in the non-P-fertilized mesocosms had even increased to a level of about 45% higher than the P-fertilized mesocosms, while the P-fertilized mesocosms showed very similar J<sub>max</sub>, v<sub>cmax</sub> and v<sub>pmax</sub> for C1 and C2. Light-induced inhibition of respiration (Fig. 1F) was variable amongst the mesocosms, though on average it tended to be higher in the non-P-fertilized mesocosms during C1, whereas no trend was observed during C2. The light compensation point was initially lower in the non-P-fertilized plants (i.e., in the stressed plants photosynthetic activity occurred at a lower light availability than in the P-fertilized treatments), whereas during C2 no differences were observed between the mesocosms (Fig. 1G).

Similar to the gas exchange measurements, the leaf chemistry showed a strong difference between non-P-fertilized and P-fertilized plots during C1, but not during C2. Direct rubisco concentration was initially lower in the non-P-fertilized mesocosms (Table 1), which was also true for the enzyme PEP-carboxylase (Table 1). A P- and campaign effect was observed for total chlorophyll (Table 1, similarly for chlorophyll<sub>a</sub> and chlorophyll<sub>b</sub>, data not shown), its concentration was four times higher in the P-fertilized mesocosms during C1. Also beta-carotene concentration was initially higher in the non-P-fertilized mesocosms (Table 1). Zeaxanthin was only detected in the non-P-fertilized leaves during C1 (Table 1). For both lutein and violaxanthin no differences among the treatments were observed during C1. There was a tendency of lower starch in the P-stressed mesocosms as compared to the P-fertilized mesocosms during C1 although there was no P effect, whereas the campaign effect and interactions P x campaign and N x P x campaign were significant.

185 During C2, direct rubisco concentration increased in the non-P-fertilized mesocosms to the same level as in P-fertilized mesocosms, while PEP-carboxylase concentration increased in all mesocosms to reach a similar level in C2. Chlorophyll concentration increased more than 12 times for the non-P-fertilized mesocosms from C1 to



C2; for the P-fertilized mesocosms almost four times. A similar trend was observed for beta-carotene (Table 1),  
 190 of which concentrations increased five- and threefold respectively. Also lutein and violaxanthin were present in  
 higher concentrations during C2 (Table 1). Zeaxanthin was not detected during C2. The leaf starch concentration  
 differed over time, leaves contained much less starch during C1 compared to C2 (Table 1).  
 One month after establishing the experimental setup (during C1), no AMF were detected in plant roots or in the  
 meshbags (Fig. 2). One month later, i.e. during C2, however, AMF had clearly established, with a mean hyphal  
 195 length density of 760 mm per gram of soil in all treatments. The percentage of roots colonized was higher in the  
 non-P-fertilized treatments than in the P-fertilized plots (67% vs. 40% on average) (Fig. 2; Ven et al., 2020a).

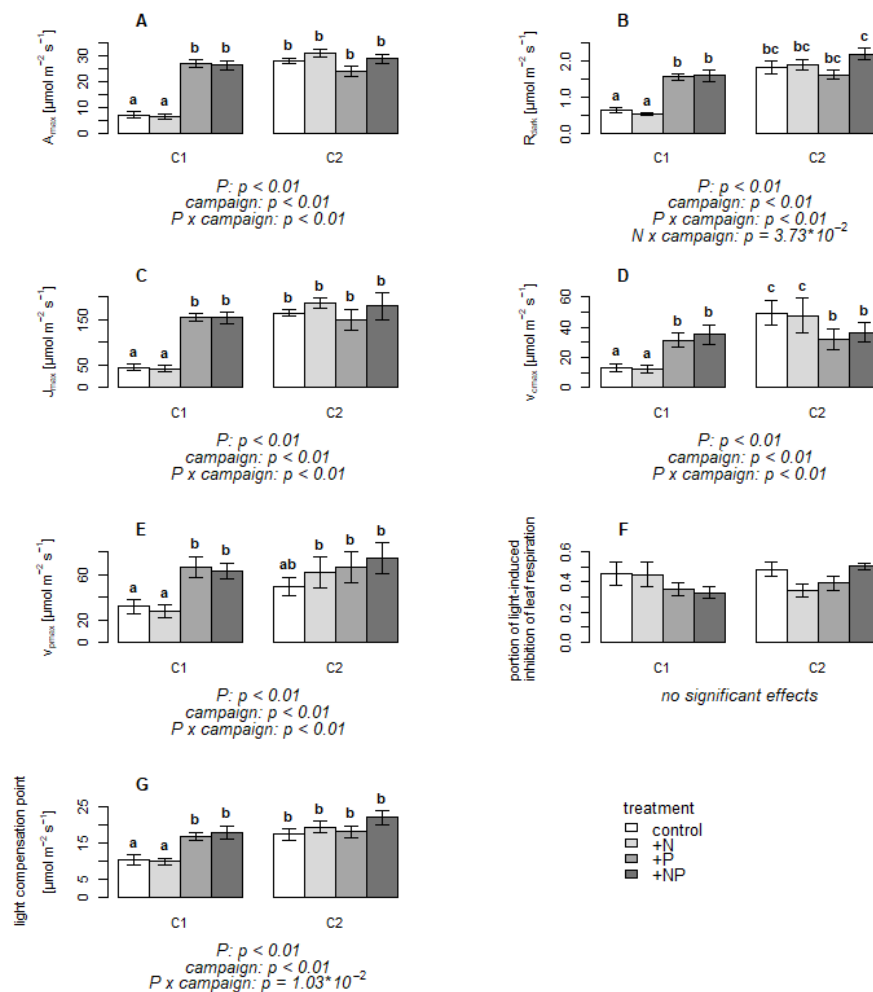

200 **Figure 1 A-G:** Means of parameters deduced from leaf CO<sub>2</sub> exchange measurements per treatment and campaign. Error bars indicate standard error. C1: campaign 1, end of June; C2: campaign 2, end of July; control treatment: not fertilized, +N treatment: nitrogen fertilized, +P treatment: Phosphorus fertilized, +NP treatment: both nitrogen and phosphorus fertilized. Letters above bars indicate statistical differences. Significant effects are given with p-value below the plots.  $A_{max}$  = maximal assimilation rate;  $R_{dark}$  = leaf dark respiration,  $R_{dark}/A_{max}$  = ratio of leaf dark respiration to maximal assimilation rate;  $J_{max}$  = maximum electron transport rate;  $v_{cmax}$  = maximal rubisco carboxylation rate;  $v_{pmax}$  = maximum PEP carboxylation rate;



205

210

**Table 1.** Means (and standard errors) of chemically analyzed leaf traits, per campaign and per treatment.

Notes: C1: campaign 1 end of June; C2: campaign 2 end of July. SE: standard error. Superscript letters indicate homogeneous groups as results from post-hoc analysis of statistical analyses of variance.

| campaign         | treat-<br>ment | leaf N                   | leaf P                     | leaf N:P                | SLA                      | direct rubisco<br>μmol 3-<br>PGA/m <sup>2</sup> min | PEP-<br>carboxylase<br>μmol HCO <sub>3</sub><br>/m <sup>2</sup> .min | total<br>chlorophyll   | beta-carotene <sup>a</sup> | zeaxanthin              | violaxanthin            | lutein                    | starch                    | insoluble<br>sugars      | soluble<br>sugars     |
|------------------|----------------|--------------------------|----------------------------|-------------------------|--------------------------|-----------------------------------------------------|----------------------------------------------------------------------|------------------------|----------------------------|-------------------------|-------------------------|---------------------------|---------------------------|--------------------------|-----------------------|
|                  |                | g m <sup>-2</sup>        | g m <sup>-2</sup>          | -                       | g m <sup>-2</sup>        | μmol 3-<br>PGA/m <sup>2</sup> min                   | μmol HCO <sub>3</sub><br>/m <sup>2</sup> .min                        | mg m <sup>-2</sup>     | mg m <sup>-2</sup>         | mg m <sup>-2</sup>      | mg m <sup>-2</sup>      | mg m <sup>-2</sup>        | g m <sup>-2</sup>         | g m <sup>-2</sup>        | mg m <sup>-2</sup>    |
| <i>p-values:</i> |                |                          |                            |                         |                          |                                                     |                                                                      |                        |                            |                         |                         |                           |                           |                          |                       |
| P                |                | < 0.01                   | < 0.01                     | < 0.01                  | < 0.01                   | < 0.01                                              | < 0.01                                                               | < 0.01                 | 3.36*10 <sup>-2</sup>      | < 0.01                  | < 0.01                  | < 0.01                    | < 0.01                    | < 0.01                   | < 0.01                |
| campaign         |                | < 0.01                   | < 0.01                     | < 0.01                  | < 0.01                   | < 0.01                                              | < 0.01                                                               | < 0.01                 | < 0.01                     | < 0.01                  | < 0.01                  | < 0.01                    | < 0.01                    | < 0.01                   | < 0.01                |
| P x campaign     |                | < 0.01                   | < 0.01                     | < 0.01                  | < 0.01                   | < 0.01                                              | < 0.01                                                               | < 0.01                 | < 0.01                     | < 0.01                  | < 0.01                  | 2.78*10 <sup>-2</sup>     | < 0.01                    | < 0.01                   | < 0.01                |
| P x N            |                | 3.93*10 <sup>-2</sup>    |                            |                         | 2.25*10 <sup>-2</sup>    |                                                     |                                                                      |                        |                            |                         |                         |                           |                           |                          |                       |
| P x N x campaign |                | 4.99*10 <sup>-2</sup>    |                            |                         | 3.24*10 <sup>-2</sup>    |                                                     |                                                                      |                        |                            |                         |                         |                           | 4.22*10 <sup>-2</sup>     |                          |                       |
| <b>C1</b>        |                |                          |                            |                         |                          |                                                     |                                                                      |                        |                            |                         |                         |                           |                           |                          |                       |
| control          |                | 0.66 <sup>a</sup> (0.03) | 50.8 <sup>a</sup> (0.001)  | 37.1 <sup>a</sup> (1.7) | 50.8 <sup>a</sup> (1.5)  | 39 <sup>a</sup> (8)                                 | 66 <sup>a</sup> (4)                                                  | 82 <sup>a</sup> (41)   | 33.0 <sup>a</sup> (8.6)    | 10.3 <sup>a</sup> (3.1) | 1.3 <sup>a</sup> (0.8)  | 6.4 <sup>a</sup> (3.7)    | 0.33 <sup>a</sup> (0.06)  | 0.49 <sup>a</sup> (0.03) | 52 <sup>a</sup> (3)   |
| +N               |                | 0.66 <sup>a</sup> (0.02) | 53.2 <sup>a</sup> (0.001)  | 37.3 <sup>a</sup> (0.6) | 53.2 <sup>a</sup> (0.9)  | 35 <sup>a</sup> (5)                                 | 54 <sup>a</sup> (9)                                                  | 71 <sup>a</sup> (21)   | 25.7 <sup>a</sup> (9.2)    | 7.1 <sup>a</sup> (2.8)  | 0.3 <sup>a</sup> (0.1)  | 2.6 <sup>a</sup> (1.3)    | 0.27 <sup>a</sup> (0.06)  | 0.45 <sup>a</sup> (0.04) | 56 <sup>a</sup> (8)   |
| +P               |                | 1.01 <sup>b</sup> (0.04) | 36.4 <sup>b</sup> (0.008)  | 19.2 <sup>b</sup> (2.0) | 36.4 <sup>b</sup> (2.2)  | 92 <sup>b</sup> (6)                                 | 182 <sup>b</sup> (27)                                                | 231 <sup>b</sup> (63)  | 48.9 <sup>b</sup> (3.8)    | 0 <sup>b</sup> 0        | 3.5 <sup>b</sup> (1.2)  | 5.5 <sup>b</sup> (2.6)    | 0.49 <sup>ab</sup> (0.11) | 1.29 <sup>b</sup> (0.13) | 73 <sup>b</sup> (12)  |
| +NP              |                | 1.32 <sup>c</sup> (0.10) | 31.3 <sup>c</sup> (0.008)  | 20.5 <sup>b</sup> (1.2) | 31.3 <sup>c</sup> (2.9)  | 112 <sup>b</sup> (6)                                | 218 <sup>b</sup> (21)                                                | 351 <sup>b</sup> (79)  | 52.6 <sup>b</sup> (13.6)   | 0 <sup>b</sup> 0        | 4.7 <sup>b</sup> (1.4)  | 6.5 <sup>b</sup> (2.0)    | 0.47 <sup>a</sup> (0.06)  | 1.41 <sup>b</sup> (0.20) | 88 <sup>b</sup> (10)  |
| <b>C2</b>        |                |                          |                            |                         |                          |                                                     |                                                                      |                        |                            |                         |                         |                           |                           |                          |                       |
| control          |                | 1.37 <sup>c</sup> (0.02) | 26.4 <sup>cd</sup> (0.003) | 13.4 <sup>c</sup> (0.3) | 26.4 <sup>cd</sup> (0.7) | 95 <sup>b</sup> (9)                                 | 275 <sup>c</sup> (28)                                                | 944 <sup>c</sup> (41)  | 137.5 <sup>c</sup> (8.2)   | 0 <sup>b</sup> 0        | 20.3 <sup>c</sup> (2.0) | 38.2 <sup>ab</sup> (9.0)  | 1.08 <sup>bc</sup> (0.09) | 3.89 <sup>b</sup> (0.63) | 212 <sup>b</sup> (15) |
| +N               |                | 1.49 <sup>c</sup> (0.32) | 25.8 <sup>cd</sup> (0.022) | 14.5 <sup>c</sup> (0.5) | 25.8 <sup>cd</sup> (5.2) | 98 <sup>b</sup> (22)                                | 290 <sup>c</sup> (68)                                                | 995 <sup>c</sup> (21)  | 139.0 <sup>c</sup> (30.1)  | 0 <sup>b</sup> 0        | 22.9 <sup>b</sup> (6.5) | 39.6 <sup>ab</sup> (11.8) | 1.39 <sup>c</sup> (0.36)  | 2.86 <sup>b</sup> (0.65) | 192 <sup>b</sup> (47) |
| +P               |                | 1.36 <sup>c</sup> (0.07) | 20.5 <sup>d</sup> (0.005)  | 14.8 <sup>c</sup> (0.4) | 20.5 <sup>d</sup> (1.0)  | 121 <sup>b</sup> (22)                               | 307 <sup>c</sup> (34)                                                | 1119 <sup>d</sup> (63) | 153.4 <sup>d</sup> (12.7)  | 0 <sup>b</sup> 0        | 28.9 <sup>b</sup> (7.5) | 67.4 <sup>b</sup> (6.6)   | 1.28 <sup>c</sup> (0.21)  | 3.97 <sup>b</sup> (0.62) | 209 <sup>b</sup> (22) |
| +NP              |                | 1.38 <sup>c</sup> (0.08) | 22.5 <sup>d</sup> (0.008)  | 12.5 <sup>c</sup> (0.7) | 22.5 <sup>d</sup> (0.9)  | 123 <sup>b</sup> (10)                               | 296 <sup>c</sup> (11)                                                | 1083 <sup>d</sup> (79) | 146.2 <sup>d</sup> (15.7)  | 0 <sup>b</sup> 0        | 24.6 <sup>c</sup> (3.1) | 63.6 <sup>b</sup> (11.4)  | 0.86 <sup>bc</sup> (0.06) | 3.36 <sup>b</sup> (0.29) | 261 <sup>b</sup> (56) |

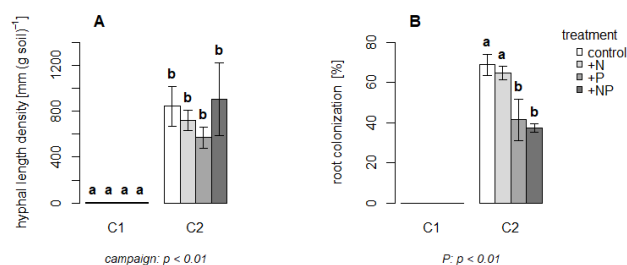

215

**Figure 2:** Means of mycorrhizal hyphal length (A) and root colonization (B) by time of C1 and C2. Error bars indicate standard error. Letters above bars indicate statistical differences. Significant effects are given with p-value below the plots

#### 4 Discussion

220 The unfertilized soil in our experiment can be assumed to be **P-limited**, as previously reported in Verlinden et al. (2018). Addition of P increased plant productivity, whereas N addition did not. End-of-season dry biomass reached  $81 (\pm 7)$  and  $510 (\pm 24)$   $\text{g m}^{-2}$  for the non-P-fertilized and P-fertilized treatments, respectively (Verlinden et al., 2018). N addition ~~neither had an~~ effect on the leaf-scale measurements, therefore we further focus on effects of P. Leaf photosynthetic parameters and most leaf chemistry parameters showed clear changes throughout the season, as verified by the significant P x campaign interaction effects (Fig. 1, Table 1). During C1, leaf P concentrations in the non-P-fertilized plants were three times lower than in the P-fertilized plants, whereas leaf P concentrations were similar for non-P-fertilized and P-fertilized treatments during C2. Since leaf N:P ratios higher than 16 (Koerselman and Meuleman, 1996) up to 20 (Güsewell, 2004) **are considered to be P-limited**, the high leaf N:P ratios of about 37 illustrate a clear **P-limitation** for the non-P-fertilized treatments in C1, while the P-fertilized treatments are close to P-limitation. In C2, plants seem to have reached an **optimal** allocation of N and P, as shown by the **optimal** N:P ratio (i.e. between 9 and 18, Beauchamp and Hamilton, 1970) similar in all treatments. **The initial P-limitation present during C1, strongly limited leaf-level photosynthesis as  $A_{\text{max}}$ ,  $J_{\text{max}}$  and  $v_{\text{cmax}}$  were three to four times lower in non-P-fertilized than in P-fertilized plants. This inhibitory effect can be attributed to the decrease in the pool size of ribulose-1,5-bisphosphate (RuBP) and its regeneration (Jacob and Lawlor, 1992; Pieters et al., 2001; Calderón-Vázquez et al., 2009).** In line with this, rubisco levels were about three times lower in the non-P-fertilized plants (Table 1). Insufficient P restricts the conversion of adenosine diphosphate (ADP) to ATP, limiting the RuBP regeneration (Rao and Terry, 1989; Calderón-Vázquez et al., 2009).  $C_4$  plants can maintain adequate levels of P in the bundle ~~sheet~~ cells, and therefore generally **suffer** less from P limitation as compared to  $C_3$  plants (Calderón-Vázquez et al., 2009). This implies that, plants with absent P fertilization experienced extreme P limitation early in the season in our experiment. Nonetheless, during C2, photosynthetic parameters reached similar values among all treatments. Total chlorophyll can drop drastically in case of P deprivation (Jacob and Lawlor, 1991; Usuda and Shimogawara, 1991). In our experiment, chlorophyll concentration was initially lower in the non-P-fertilized mesocosms as compared to the P-fertilized mesocosms. During C2, however, chlorophyll ~~content~~ strongly increased in all treatments, both in the initially non-P-fertilized plants where chlorophyll increase was accompanied by increased photosynthesis, but also in the P-fertilized plants. In the latter ones  $A_{\text{max}}$  did not differ

235

240

245





between C1 and C2, indicating that photosynthesis did not increase despite the increase in chlorophyll concentration. Zeaxanthin concentrations were only detected in the non-P-fertilized plants during C1. Schlüter et al. (2013) showed the enhancement of protective pigments, such as zeaxanthin, in maize leaves when growing at  
250 low P availability. Zeaxanthin plays a key role in the protection of photosynthetic organisms against excess light, minimizing the over-excitation (Jahns and Holzwarth, 2012; Kuczyńska et al., 2012; Ashraf and Harris, 2013). The xanthophyll violaxanthin is reversibly de-epoxidized to zeaxanthin in the xanthophyll cycle ~~in case~~ the light absorbed exceeds the capacity of photosynthesis. Zeaxanthin synthesis thus acts as a rescuing mechanism in strongly photo-oxidizing conditions (Dall'Osto et al., 2010) and increased zeaxanthin concentrations imply a  
255 decrease of light harvesting. In our experiment, no detectable zeaxanthin amounts were detected later in the season, indicating that stress, likely due to P-limitation, seemed relieved and plant growth recovered, as also indicated by the increased net photosynthetic rate.

P deprivation has been found to increase the leaf starch ~~content~~ in maize (Zhang et al., 2014), although decreases in starch levels under **low** P conditions have also been reported (Schlüter et al., 2013). In our experiment, P  
260 addition had no clear effect on the leaf starch **content** (Table 1), but the starch concentration did show a significant campaign effect and more than doubled from C1 to C2. **Unlike C<sub>3</sub> plants, synthesis of sucrose and starch in C<sub>4</sub> leaves takes place in different cell types. Whereas starch accumulates in the bundle sheath, sucrose synthesis takes place in the mesophyll (Friso et al., 2010). A shift towards sucrose or starch would thus affect the metabolism of both cell types in different ways.** Both sucrose and starch synthesis play important roles in the  
265 cellular recycling of phosphate for photosynthesis (Schlüter et al., 2013). A decrease in sugars and starch might lead to lower vitality and productivity of plants, as was previously observed in stressed C<sub>4</sub> leaves (da Silva and Arrabaça, 2004). **Due to stress, a larger proportion of starch can possibly be converted to soluble sugars, thereby decreasing the osmotic potential as a form of protection (da Silva and Arrabaça, 2004).** In our experiment, while there was no effect of P for both sugars and starch, the campaign effect illustrated an increase of sugars and  
270 starch from C1 to C2, possibly suggesting that plants in all treatments experienced nutrient stress during C1.

Foliar respiration rate is suppressed in the light ~~and~~ is known as the 'Kok effect', which is the abrupt decline in quantum yield of net CO<sub>2</sub> assimilation that occurs at very low light, often near the photosynthetic light compensation point (Kok, 1948). This light-induced inhibition of foliar respiration is reported to vary between 25%-100% (see references in Heskell et al., 2013) and is a source of uncertainty in current models of global  
275 terrestrial carbon cycling (Heskell and Tang, 2018). It can be impacted by environmental conditions such as temperature and soil nutrient availability (Heskell et al., 2012; Atkin et al., 2013). Here, the light-induced inhibition of respiration was highly variable among measured plants largely ranging from 0.3 to 0.5 with high uncertainty levels. Several studies showed that increased soil nutrient availability can relax the degree of light induced respiration, which was not confirmed in our experiment (Heskell et al., 2012; Atkin et al., 2013; Shapiro  
280 et al., 2004).

We applied 20 kg P ha<sup>-1</sup> for the P treatment at which  $A_{max}$  reached its maximum value of about 27  $\mu\text{mol m}^{-2} \text{s}^{-1}$ . Zhang et al. (2014) showed that the critical level of P application for maximal net photosynthetic rate of maize (i.e. 30.3  $\mu\text{mol CO}_2 \text{ m}^{-2} \text{ s}^{-1}$ ) ~~was~~ between 15 and 28 kg ha<sup>-1</sup>, which is in agreement with our study. Higher P application rates did not result in higher net photosynthetic rates. In our experiment the non-P-fertilized plants  
285 reached similar net photosynthetic rates, but only after colonization by AMF during C2. The campaign effect revealed in our experiment, i.e. the remarkable difference in P effect between C1 and C2, was associated with



the (slow) establishment of AMF, which may suggest that increased plant P uptake following mycorrhization caused a [revival](#) of the non-P-fertilized plants, and was beneficial for productivity in the P-fertilized plants as well (Verlinden et al., 2018). Interestingly, in the absence of AMF, plants that did not receive extra P died prematurely (i.e., in pasteurized mesocosms not included in this study, but see Verlinden et al. (2018) and Ven et al. (2020b)). The similar leaf P concentrations in all treatments during C2 further supports our assumption of a strong stimulation of P-acquisition through mycorrhizae in the non-P-fertilized plants. The establishment of mycorrhizal (~~fungus-root~~)-symbioses is believed to be one of the most successful strategies to maximize the access of plant roots to available P and thus overcome P stress (Smith and Read, 2008; Sánchez-Calderón et al., 2010). The hyphal network of mycorrhizae [extends](#), over a very large surface area, increasing prominently the absorbing area of roots. Besides, [mycorrhizal fungi improve phosphate solubility](#) (Smith & Read 2008), and their extraradical hyphae extend beyond the P depletion zone, absorbing P that is otherwise not accessible for the plant (Plenchette et al., 2005; Roy-Bolduc and Hijri, 2011). Mycorrhizae thus significantly contribute to plant nutrition and to P uptake in particular (Wright et al., 2005), which in turn can positively affect leaf gas exchange rates (Smith and Read, 2008; Augé et al., 2016). Here, the photosynthetic parameters increased, coinciding the mycorrhization-induced improved P nutrition in the non-P-fertilized plants. [The 'machinery-limited' photosynthesis system](#) even seemed to fully recover as observed by similar levels of photosynthesis during C2 among all treatments. These results are in line with the study by Řezáčová et al. (2018), who reported photosynthetic upregulation following C sink stimulation upon the establishment of mycorrhizal symbiosis .  
[To conclude, low P availability significantly decreased photosynthetic capacity, associated with reduced concentrations of photosynthetic enzymes and pigments.](#) In contrast to the expected increase in nutrient stress because of further depletion of the soil as the growing season progressed, nutrient stress decreased over time and for most leaf processes, pigments and enzymes under study, the fertilization effect had disappeared two months after planting. Our results point towards a key role for the AMF-symbiosis and consequent increase of P uptake in explaining the vanishing P stress.

#### Author contributions

S.V. designed the experiment and research; M.S.V., H.A. and A.V. conducted the field- and lab work; M.S.V. made first data analysis and draft of the manuscript; all authors provided expert advice and critically reviewed the manuscript.

#### 315 Acknowledgements

This research was supported by the Research Foundation—Flanders (FWO) [grant numbers G0D5415N, 12U8918N, 12K0316N]; the European Research Council [grant number ERC-SyG-610028 IMBALANCE-P]; ClimMani COST Action [grant number ES1308]; the European Union Horizon 2020 Research and Innovation program under the Marie Skłodowska-Curie grant (ReSPEc) [grant number 795299] and Methusalem funding of the Research Council UA. We gratefully acknowledge Fred Kockelbergh and Marc Wellens for technical support; Bart Hellemans, Lin Leemans, and Eddy De Smet for logistic support at the field site.



## References

- Abdelgawad, H., Peshev, D., Zinta, G., Van den Ende, W., Janssens, I. A. and Asard, H.: Climate extreme effects on the chemical composition of temperate grassland species under ambient and elevated CO<sub>2</sub>: a comparison of fructan and non-Fructan accumulators. *Plos One*, 9, e92044, doi: 10.1371/journal.pone.0092044, 2014.
- Ashraf, M. and Harris, P. J. C.: Photosynthesis under stressful environments: An overview. *Photosynthetica*, 51, 163–190, doi: 10.1007/s11099-013-0021-6, 2013.
- Atkin, O. K., Turnbull, M. H., Zaragoza-Castells, J., Fyllas, N. M., Lloyd J., Meir, P. and Griffin, K. L.: Increased light inhibition of respiration as soil fertility declines along a post-glacial chronosequence in New Zealand. *Plant Soil*, 367, 163–182, doi: 10.1007/s11104-013-1686-0, 2013.
- Augé, R. M., Toler, H. D. and Saxton, A. M.: Mycorrhizal stimulation of leaf gas exchange in relation to root colonization, shoot size, leaf phosphorus and nitrogen: a quantitative analysis of the literature using meta-regression. *Front. Plant Sci.*, 7, 1084, doi: 10.3389/fpls.2016.01084, 2016.
- Augusto, L., Achat, D. L., Jonard, M., Vidal, D. and Ringeval, B.: Soil parent material—A major driver of plant nutrient limitations in terrestrial ecosystems. *Glob. Change Biol.*, 23, 3808–3824, doi: 10.1111/gcb.13691, 2017.
- Beauchamp, E. G. and Hamilton, H. A.: Optimum ratios of nitrogen and phosphorus fertilizers for corn determined by Homes' method of systematic variation. *Can. J. Plant Sci.*, 50, 141–150, doi: 10.4141/cjps70-027, 1970.
- Brooks, A.: Effects of phosphorus nutrition on ribulose 1,5-bisphosphate carboxylase activation, photosynthetic quantum yield and amounts of some Calvin-cycle metabolites in spinach leaves. *Aust. J. Plant Physiol.* 13, 221–237, doi: 10.1071/PP9860221, 1986.
- Calderón-Vázquez, C., Alatorre-Cobos, F., Simpson-Williamson, J. and Herrera-Estrella, L.: Maize under phosphate limitation, in: *Handbook of Maize: Its Biology*, edited by: Bennetzen, J. L. and Hake, S. C., Springer, New York, USA, 381–404, doi: 10.1007/978-0-387-79418-1\_19, 2009.
- Dall'Osto, L., Cazzaniga, S., Havaux, M. and Bassi, R.: Enhanced photoprotection by protein-bound vs free xanthophyll pools: a comparative analysis of chlorophyll b and xanthophyll biosynthesis mutants. *Mol. Plant.*, 3, 576–593, doi: 10.1093/mp/ssp117, 2010.
- da Silva, J. M. and Arrabaça, M. C.: Contributions of soluble carbohydrates to the osmotic adjustment in the C<sub>4</sub> grass *Setaria sphacelata*: A comparison between rapidly and slowly imposed water stress. *J. Plant Physiol.*, 161, 551–555, doi: 10.1078/0176-1617-01109, 2004.
- Duursma, R.A.: Plantecophys - An R Package for Analysing and Modelling Leaf Gas Exchange Data. *Plos One*, 10, e0143346, doi: 10.1371/journal.pone.0143346, 2015.
- Friso, G., Majeran, W., Huang, M. S., Sun, Q. and van Wijk, K. J.: Reconstruction of metabolic pathways, protein expression, and homeostasis machineries across maize bundle sheath and mesophyll chloroplasts: large-scale quantitative proteomics using the first maize genome assembly. *Plant Physiol.*, 152, 1219–1250, doi: 10.1104/pp.109.152694, 2010.
- Güsewell, S.: N:P ratios in terrestrial plants: Variation and functional significance. *New Phytol.*, 164, 243–266, doi: 10.1111/j.1469-8137.2004.01192.x, 2004.



- Halsted, M. and Lynch, J.P.: Phosphorus responses of C<sub>3</sub> and C<sub>4</sub> species. *J. Exp. Bot.*, 47, 497–505, doi: 10.1093/jxb/47.4.497, 1996.
- Hartnett, D. C. and Wilson, G. W. T.: Mycorrhizae influence plant community structure and diversity in tallgrass prairie. *Ecology*, 80, 1187–1195, doi: 10.1890/0012-9658(1999)080[1187:MIPCSA]2.0.CO;2, 1999.
- 365 Heskell, M. A., Anderson, O. R., Atkin, O. K., Turnbull, M. H. and Griffin, K. L.: Leaf- and cell-level carbon cycling responses to a nitrogen and phosphorus gradient in two Arctic tundra species. *Am. J. Bot.*, 99, 1702–1714, doi: 10.3732/ajb.1200251, 2012.
- Heskell, M. A., Atkin, O. K., Turnbull, M. H., Griffin, K. L.: Bringing the Kok effect to light: A review on the integration of daytime respiration and net ecosystem exchange. *Ecosphere*, 4, 98, doi: 10.1890/ES13-00120.1, 2013.
- 370 Heskell, M. A. and Tang, J.: Environmental controls on light inhibition of respiration and leaf and canopy daytime carbon exchange in a temperate deciduous forest. *Tree Physiol.*, 38, 1886–1902, doi: 10.1093/treephys/tpy103, 2018.
- Hoeksema, J. D., Chaudhary, V. B., Gehring, C. A., Johnson, N. C., Karst, J., Koide, R. T., Pringle, A., Zabinski, C., Bever, J. D., Moore, J. C., Wilson, G. W. T., Klironomos, J. N., Umbanhowar, J.: A meta-analysis of context-dependency in plant response to inoculation with mycorrhizal fungi. *Ecol. Lett.*, 13, 394–407, doi: 10.1111/j.1461-0248.2009.01430.x, 2010.
- Jacob, J. and Lawlor, D. W.: Stomatal and mesophyll limitations of photosynthesis in phosphate deficient sunflower, maize and wheat plants. *J. Exp. Bot.*, 42, 1003–1011, doi: 10.1093/jxb/42.8.1003, 1991.
- 380 Jacob, J. and Lawlor, D. W.: Dependence of photosynthesis of sunflower and maize leaves on phosphate supply, ribulose-1,5-bisphosphate carboxylase/oxygenase activity, and ribulose-1,5-bisphosphate pool size. *Plant Physiol.*, 98, 801–807, doi: 10.1104/pp.98.3.801, 1992.
- Jahns, P. and Holzwarth, A. R.: The role of the xanthophyll cycle and of lutein in photoprotection of photosystem II. *Biochim. Biophys. Acta*, 1817, 182–193, doi: 10.1016/j.bbabi.2011.04.012, 2012.
- 385 Johnston, A. E. and Poulton, P. R.: Phosphorus in Agriculture: A Review of Results from 175 Years of Research at Rothamsted, UK. *J. Environ. Qual.*, 48, 1133–1144, doi: 10.2134/jeq2019.02.0078, 2019.
- Khan, A., Lu, G., Ayaz, M., Zhang, H., Wang, R., Lv, F., Yang, X., Sun, B. and Zhang, S.: Phosphorus efficiency, soil phosphorus dynamics and critical phosphorus level under long-term fertilization for single and double cropping systems. *Agr. Ecosyst. Environ.*, 256, 1–11, doi: 10.1016/j.agee.2018.01.006, 2018.
- 390 Koerselman, W. and Meuleman, A. F. M.: The vegetation N:P ratio: a new tool to detect the nature of nutrient limitation. *J. Appl. Ecol.*, 33, 1441–1450, doi: 10.2307/2404783, 1996.
- Kok, B.: A critical consideration of the quantum yield of Chlorella-photosynthesis. *Enzymologia*, 13, 1–56, 1948.
- Kuczyńska, P., Latowski, D., Niczyporuk, S., Olchawa-Pajor, M., Jahns, P., Gruszecki, W. I. and Strzałka, K.: Zeaxanthin epoxidation - an in vitro approach. *Acta Biochim. Pol.* 59, 105–107, doi: 10.18388/abp.2012\_2182, 2012.
- 395 Miner, G. L. and Bauerle, W. L.: Seasonal responses of photosynthetic parameters in maize and sunflower and their relationship with leaf functional traits. *Plant Cell Environ.*, 42, 1561–1574, doi: 10.1111/pce.13511, 2019.



- 400 Paul, M. J. and Stitt, M.: Effects of nitrogen and phosphorus deficiencies on levels of carbohydrates, respiratory enzymes and metabolites in seedlings of tobacco and their response to exogenous sucrose. *Plant Cell Environ.*, 16, 1047-1057, doi: 10.1111/j.1365-3040.1996.tb02062.x, 1993.
- Pieters, A. J., Paul, M. J. and Lawlor, D. W.: Low sink demand limits photosynthesis under P(i) deficiency. *J. Exp. Bot.*, 52, 1083-1091, doi: 10.1093/jexbot/52.358.1083, 2001.
- 405 Plenchette, C., Clermont-Dauphin, C., Meynard, J. M. and Fortin, J. A.: Managing arbuscular mycorrhizal fungi in cropping systems. *Can. J. Plant Sci.*, 85, 31-40, doi: 10.4141/P03-159, 2005.
- Rao, I. M. and Terry, N.: Leaf phosphate status, photosynthesis, and carbon partitioning in sugar beet I. Changes in growth, gas exchange, and Calvin cycle enzymes. *Plant Physiol.*, 90, 814-819, doi: 10.1104/pp.90.3.814, 1989.
- 410 Řezáčová, V., Slavíková, R., Zemková, L., Konvalinková, T., Procházková, V., Št'oviček, V., Hršelová, H., Beskid, O., Hujšlová, M., Gryndlerová, H., Gryndler, M., Püschel, D. and Jansa, J.: Mycorrhizal symbiosis induces plant carbon reallocation differently in C<sub>3</sub> and C<sub>4</sub> Panicum grasses. *Plant Soil*, 425, 441-456, doi: 10.1007/s11104-018-3606-9, 2018.
- Rillig, M. C., Field, C. B., Allen, M. F.: Soil biota responses to long-term atmospheric CO<sub>2</sub> enrichment in two California annual grasslands. *Oecologia*, 119, 572-577, doi: 10.1007/s004420050821, 1999.
- 415 Rogers, A.: The use and misuse of V<sub>c,max</sub> in Earth System Models. *Photosynth. Res.*, 119, 15-29, doi: 10.1007/s11120-013-9818-1, 2014.
- Roy-Bolduc, A. and Hijri, M.: The use of mycorrhizae to enhance phosphorus uptake: A way out the phosphorus crisis. *J. Biofertil. Biopестици.*, 2, 104, doi: 10.4172/2155-6202.1000104, 2011.
- 420 Sánchez-Calderón, L., Chacon-López, A., Perez-Torres, C. and Herrera-Estrella, L.: Phosphorus: Plants strategies to cope with its scarcity, in: *Cell Biology of Metals and Nutrients*. Plant Cell Monographs, vol 17, edited by: Hell, R. and Mendel, R.R., Springer, Berlin, Heidelberg, Germany, 173-198, doi: 10.1007/978-3-642-10613-2\_8, 2010.
- Schlüter, U., Colmsee, C., Scholz, U., Bräutigam, A., Weber, A. P. M., Zellerhoff, N., Bucher, M., Fahnenstich, H. and Sonnewald, U.: Adaptation of maize source leaf metabolism to stress related disturbances in carbon, nitrogen and phosphorus balance. *BMC Genomics* 14, 442, doi: 10.1186/1471-2164-14-442, 2013.
- 425 Schulze, E.-D., Beck, E. and Müller-Hohenstein, K. (Eds.): *Plant Ecology*, Springer, Berlin, Heidelberg, Germany, 2005.
- 430 Shapiro, J. B., Griffin, K. L., Lewis, J. D. and Tissue, T. D.: Response of *Xanthium strumarium* leaf respiration in the light to elevated CO<sub>2</sub> concentration, nitrogen availability and temperature. *New Phytol.*, 162, 377-386, doi: 10.1111/j.1469-8137.2004.01046.x, 2004.
- Smith, S. E. and Read, D. J. (Eds.): *Mycorrhizal Symbiosis* (Third Edition), Academic Press, London, UK, 2008.
- Sulpice, R., Tschoep, H., von Korff, M., Bussis, D., Usadel, B., Hohne, M., Witucka-Wall, H., Altmann, T., 435 Stitt, M. and Gibon, Y.: Description and applications of a rapid and sensitive non-radioactive microplate-based assay for maximum and initial activity of D-ribulose-1,5-bisphosphate carboxylase/oxygenase. *Plant Cell Environ.*, 30, 1163-1175, doi: 10.1111/j.1365-3040.2007.01679.x, 2007.



- 440 Temminghoff, E. E. J. M. and Houba, V. J. G.: Plant Analysis Procedures. Springer Netherlands, Dordrecht, doi:  
10.1007/978-1-4020-2976-9, 2004.
- Tennant, D.: A test of a modified line intersect method of estimating root length. *J. Ecol.*, 63, 995-1001, doi:  
10.2307/2258617, 1975.
- Usuda, H. and Shimogawara, K.: Phosphate deficiency in maize. I. Leaf phosphate status, growth,  
photosynthesis and carbon partitioning. *Plant Cell Physiol.*, 32, 497-504, doi:  
445 10.1093/oxfordjournals.pcp.a078107, 1991.
- Ven, A., Verbruggen, E., Verlinden, M. S., Olsson, P. A., Wallander, H. and Vicca, S.: Mesh bags  
underestimated arbuscular mycorrhizal abundance but captured fertilization effects in a mesocosm  
experiment. *Plant Soil*, 446, 563–575, doi: 10.1007/s11104-019-04368-4, 2020a.
- 450 Ven, A., Verlinden, M. S., Fransen, E., Olsson, P. A., Verbruggen, E., Wallander, H. and Vicca, S.: Phosphorus  
addition increased carbon partitioning to autotrophic respiration but not to biomass production in an  
experiment with *Zea mays*. *Plant Cell Environ.*, 43, 2054–2065, doi: 10.1111/pce.13785, 2020b.
- Verlinden, M. S., Broeckx, L. S., Zona, D., Berhongaray, G., De Groote, T., Camino Serrano, M., Janssens, I. A.  
and Ceulemans, R.: Net ecosystem production and carbon balance of an SRC poplar plantation during  
its first rotation. *Biomass Bioenerg.* 56, 412-422, doi: 10.1016/j.biombioe.2013.05.033, 2013.
- 455 Verlinden, M. S., Ven, A., Verbruggen, E., Janssens, I. A., Wallander, H. and Vicca, S.: Favorable effect of  
mycorrhizae on biomass production efficiency exceeds their carbon cost in a fertilization experiment.  
*Ecology*, 99, 2525–2534, doi: 10.1002/ecy.2502, 2018.
- von Caemmerer, S. (Ed.): Biochemical models of leaf photosynthesis. CSIRO Publishing, Victoria, Australia,  
2000.
- 460 Wright, D. P., Scholes, J. D., Read, D. J. and Rolfe, S. A.: European and African maize cultivars differ in their  
physiological and molecular responses to mycorrhizal infection. *New Phytol.*, 167, 881-896, doi:  
10.1111/j.1469-8137.2005.01472.x, 2005.
- Zhang, K., Liu, H., Tao, P. and Chen, H.: Comparative proteomic analyses provide new insights into low  
phosphorus stress responses in maize leaves. *Plos One*, 9, e98215, doi: 10.1371/journal.pone.0098215,  
465 2014.
